# Supplementary figures and images for: Supercritical methanol depolymerization and hydrodeoxygenation of pyrolytic lignin over reduced copper porous metal oxides
Source: Royal Society of Chemistry journal article supplement (doi:10.1039/d0gc02355h), 2020-01-01

## Supplementary Information

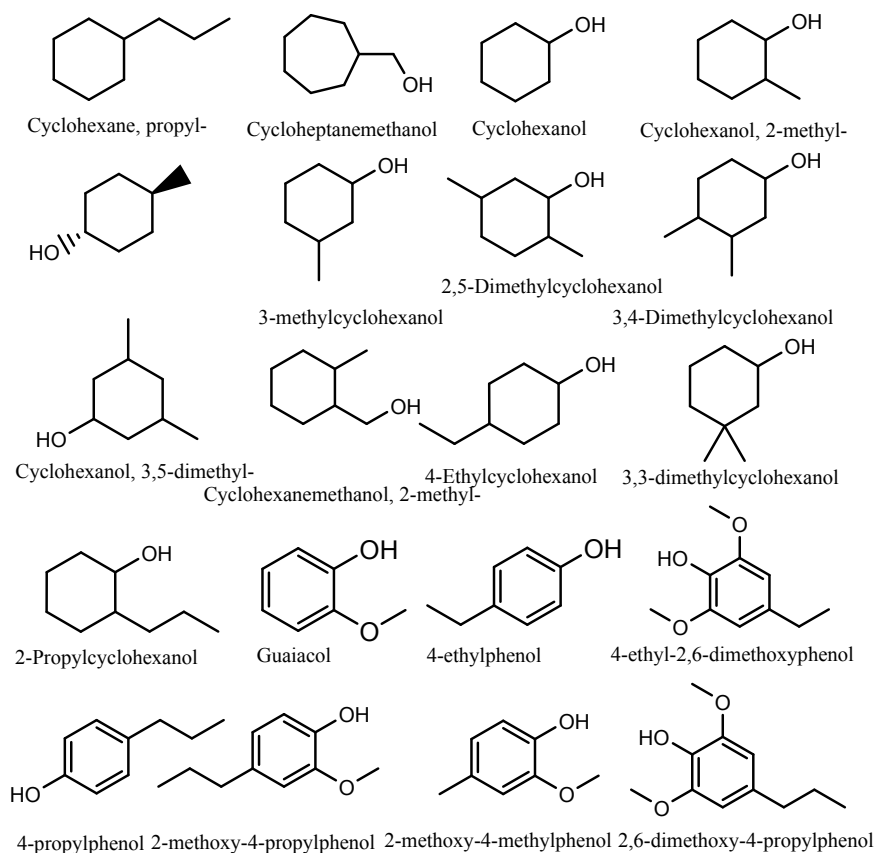

Figure.S1 the monomers structure produced by ISU PL SCM-DHDO at 4h 300°C

Supplement: d0gc02355h1.pdf [file d0gc02355h1.pdf]
